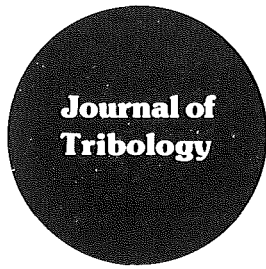

# Editorial

## A Message From the Technical Editor

This is the first issue of the ASME *Journal of Tribology* during my term as Technical Editor. Andras Szeri, Professor of Mechanical Engineering at the University of Pittsburgh, recently completed his very successful five-year term as Technical Editor of the journal. Previously he had been Associate Editor of the journal for a number of years. During Professor Szeri's term as Technical Editor, the *Journal of Tribology* solidified its position as one of the most respected technical journals in its field. The journal has maintained a tradition of excellence since its inception in 1967, and that tradition has been enhanced by Andras Szeri's enlightened editorial policies and guidance since 1988.

The Editorial Board of JOT has also witnessed some other changes during recent months. Itzhak Green (Georgia Tech) and Bernard Hamrock (Ohio State Univ.) have completed their terms as Associate Editor and Pawan Goenka (General Motors) and Frank Talke (Univ. of California, San Diego) have resigned owing to the pressure of other duties. I wish to express my thanks to these four individuals for their dedicated service to the *Journal of Tribology*. To replace them we have recruited four equally distinguished tribologists to serve as Associate Editors for a three-year term. The new members of the Editorial Board are David Brewé of the U.S. Army Propulsion Laboratory, Koji Kato of Tohoku University, Japan, Aric Kumaran Menon of Seagate Technology, and Richard Salant of Georgia Institute of Technology. I wish to welcome them to their new positions as members of the Editorial Board of this journal and to thank them for agreeing to serve the tribology community in this very important way. I very much look forward to working with them and with the rest of the Associate Editors in the coming years.

The *Journal of Tribology* continues to be interested in receiving outstanding technical articles of permanent interest to the tribology community. We plan to continue the policy of having a good mix of experimental, numerical, and theoretical articles dealing with all aspects of the field of tribology. We particularly encourage articles in areas of tribology which are the focus of new or renewed attention from researchers, such as microtribology or tribology in manufacturing. Information for prospective authors can be found on the last page of each issue of the Journal.

I also wish to ask readers of the journal to consider a personal subscription to the *Journal of Tribology*. A personal copy would enable you to have the latest research publications at your fingertips. Subscriptions to the *Journal of Tribology* can

be obtained by writing to the ASME Order Department, Fairfield, NJ 07007-2300. Subscription prices are \$40.00 annually to ASME members, \$130.00 annually to nonmembers or institutions.

As I begin my tour of duty as Technical Editor, I wish to express my thanks to Andras Szeri and the rest of the Editorial Board for the fine shape the *Journal of Tribology* is in at this time. I hope we will be able to maintain the overall excellence that has characterized the journal during Andras' time as Technical Editor. I am convinced that our journal ranks as just about the most prestigious in our field and I hope that together we can enhance that position in the coming years. I welcome any comments or suggestions that will help us maintain and improve the quality of the journal.

**Francis E. Kennedy, Jr.**  
**Thayer School of Engineering**  
**Dartmouth College**  
**Hanover, NH 03755**

## A Message From the Outgoing Division Chairperson

As outgoing division chairperson for the ASME Tribology Division, I would like to welcome Prof. Francis Kennedy, Jr. as our new Technical Editor and thank our former Editor, Prof. Andras Szeri for his outstanding dedication and service. I can't think of any other ASME position that requires a higher set of qualifications to fulfill its duties. The job calls not only for an extensive knowledge in tribology, but for a keen sense of fairness, tactfulness, and dedication to maintaining high standards. Andras served his colleagues well in performing these duties. His legacy is manifest in the uniformly excellent publications archived in the *Journal of Tribology* during his tenure.

Professor Kennedy brings with him an extensive publication record and experience as Associate Editor for both the *Journal of Tribology* and *Applied Mechanics Reviews*. Francis' keen knowledge, dedication, and abundant energy will no doubt make the transition seem transparent. Let's join to give Francis our full support.

**David E. Brewé**  
**U.S. Army Propulsion Lab.**  
**NASA Lewis Research Center**  
**21000 Brookpark Road**  
**Cleveland, OH 44135**
